# Supplementary material for: Long-term survival and successful conservation? Low genetic diversity but no evidence for reduced reproductive success at the north-westernmost range edge of Poa badensis (Poaceae) in Central Europe
Source: Springer Nature journal article supplement (doi:10.1007/s10531-019-01722-x), 2019-02-27

**Long-term survival and successful conservation? Low genetic diversity but no evidence for reduced reproductive success at the north-westernmost range edge of *Poa badensis* (Poaceae) in Central Europe.**

*Biodiversity and Conservation*. Plenk K, Bardy K, Höhn M & Kropf M.

Corresponding author: Kristina Plenk; Institute for Integrative Nature Conservation Research, University of Natural Resources and Life Sciences, Vienna, Gregor-Mendel-Str. 33, 1180 Vienna, Austria; kristina.plenk@boku.ac.at

**Online Resource 1** Exemplarily tested ploidy levels of *Poa badensis* individuals representing the three study regions (G, A, H)

The tested Austrian and Hungarian individuals showed on average a peak at 85.60 (FL1; first peak), those from the German exclave at 162.02 (FL1; first peak), i.e. indicating different ploidy levels taken as “diploidy” and “tetraploidy”. In both graphs the second peak represents the used standard *Pisum sativum* ‘Kleine Rheinländerin’ (FL1: 351.92).

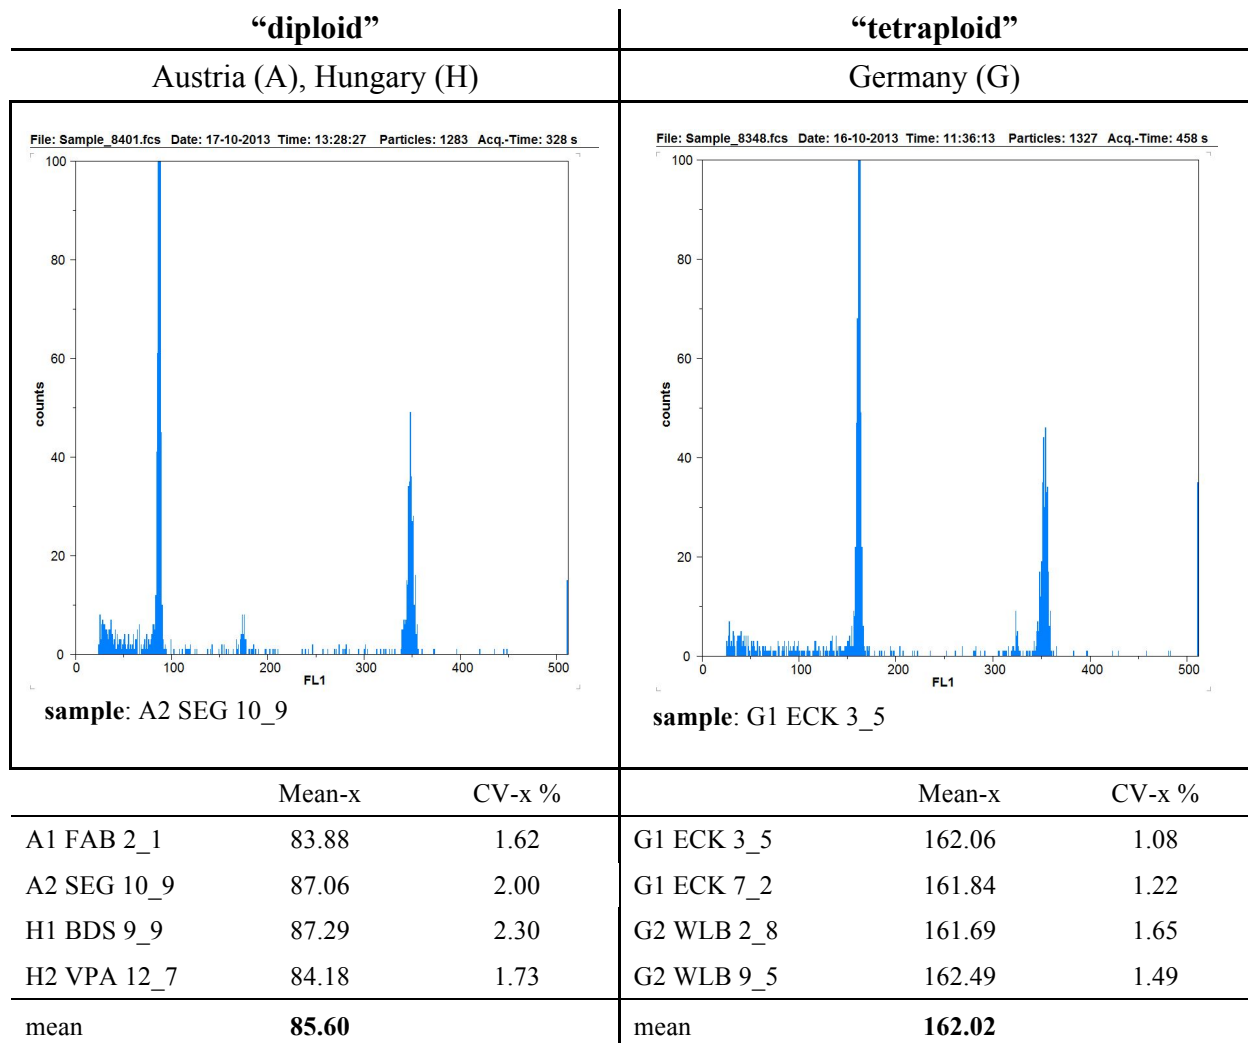

Supplement: MOESM1 [file 16515004]
