# Supplementary material for: Long-term survival and successful conservation? Low genetic diversity but no evidence for reduced reproductive success at the north-westernmost range edge of Poa badensis (Poaceae) in Central Europe
Source: Springer Nature journal article supplement (doi:10.1007/s10531-019-01722-x), 2019-02-27

# Long-term survival and successful conservation? Low genetic diversity but no evidence for reduced reproductive success at the north-westernmost range edge of *Poa badensis* (Poaceae) in Central Europe.

*Biodiversity and Conservation*. Plenck K, Bardy K, Höhn M & Kropf M.

Corresponding author: Kristina Plenck; Institute for Integrative Nature Conservation Research, University of Natural Resources and Life Sciences, Vienna, Gregor-Mendel-Str. 33, 1180 Vienna, Austria; kristina.plenck@boku.ac.at

## Online Resource 2 Individual-based Neighbor-Net of *Poa badensis* (AFLP data)

The individual-based Neighbor-Net represents the three study regions, marked with 'A', 'H', and 'GI'/'GII', i.e. representing the Austrian and Hungarian individuals and the two German subgroups (cf. Figure 1).

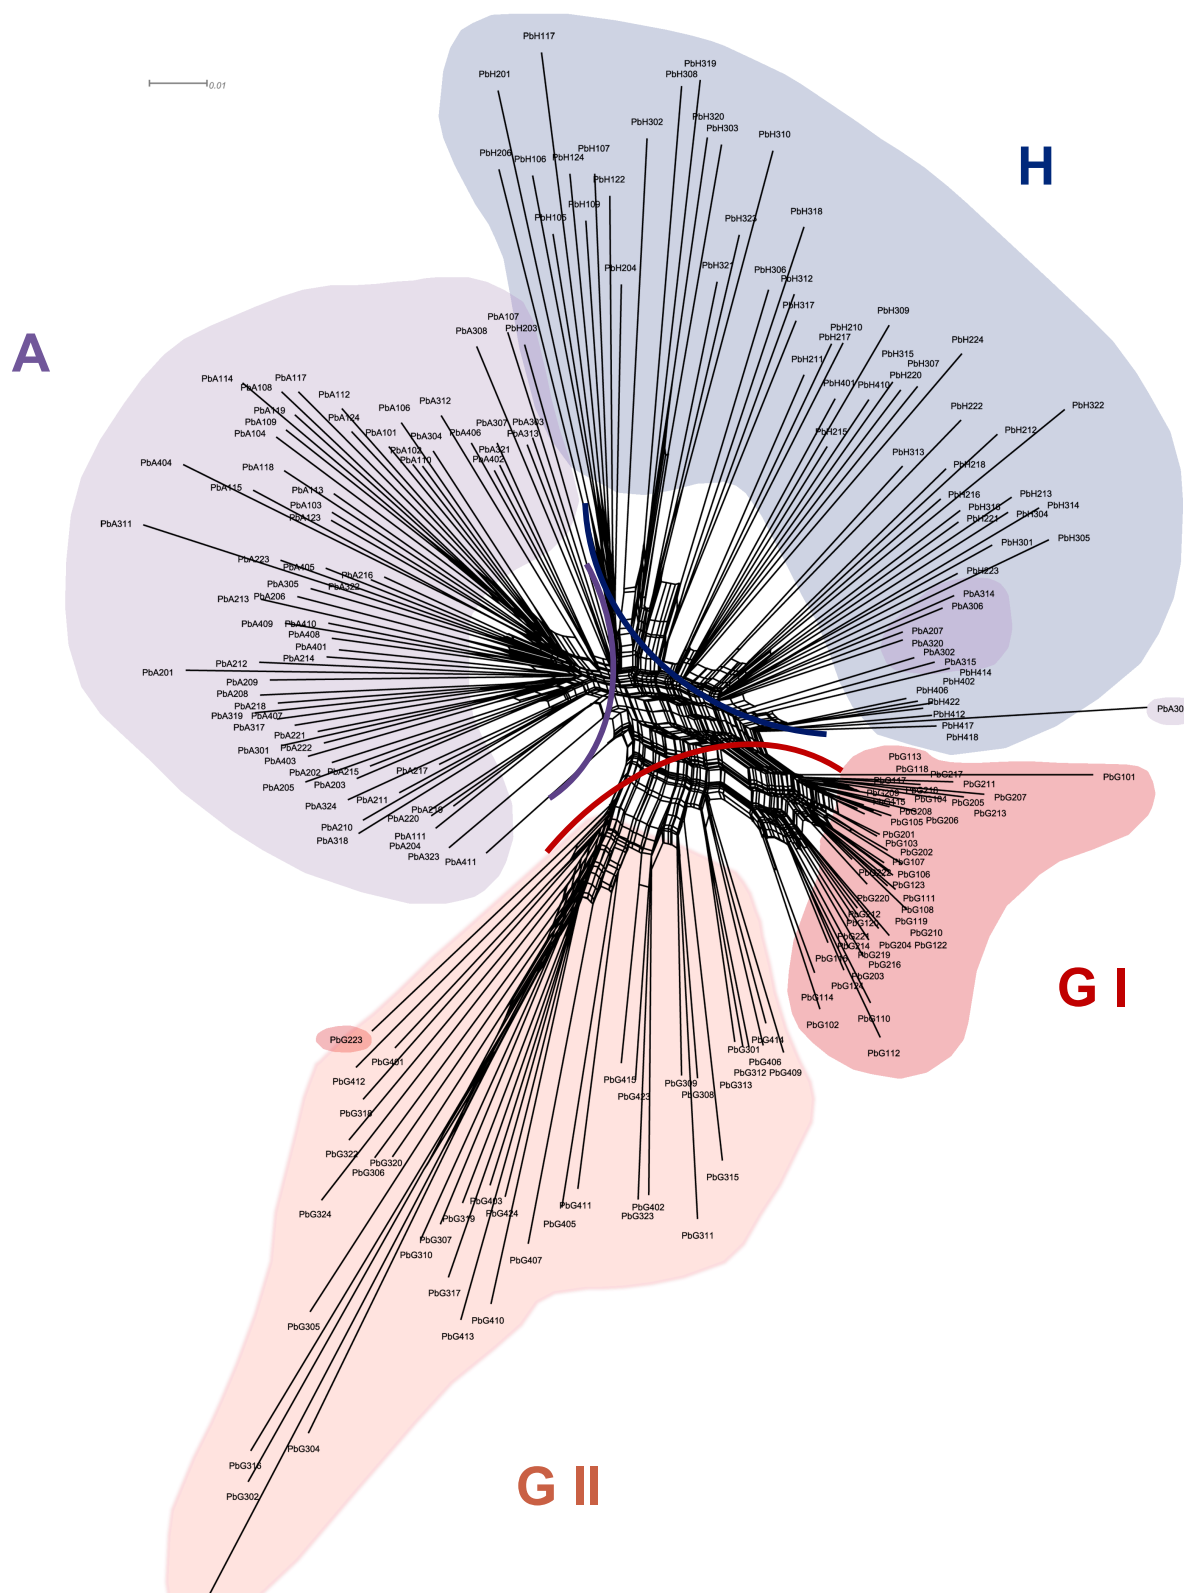

Supplement: MOESM2 [file 16515004]
