# Supplementary material for: Long-term survival and successful conservation? Low genetic diversity but no evidence for reduced reproductive success at the north-westernmost range edge of Poa badensis (Poaceae) in Central Europe
Source: Springer Nature journal article supplement (doi:10.1007/s10531-019-01722-x), 2019-02-27
Supplement: MOESM3 [file 16515004]

**Long-term survival and successful conservation? Low genetic diversity but no evidence for reduced reproductive success at the north-westernmost range edge of *Poa badensis* (Poaceae) in Central Europe.**

*Biodiversity and Conservation*. Plenk K, Bardy K, Höhn M & Kropf M.

Corresponding author: Kristina Plenk; Institute for Integrative Nature Conservation Research, University of Natural Resources and Life Sciences, Vienna, Gregor-Mendel-Str. 33, 1180 Vienna, Austria; kristina.plenk@boku.ac.at

**Online Resource 3** AMOVA analyses (AFLP data)

Analyses of molecular variance carried out without regional structure, as well as for the three geographical regions and the (north)westernmost exclave vs. the Pannonian region (i.e. Austrian and Hungarian populations). Further, non-hierarchical analyses were calculated to obtain population differentiation within the (north)westernmost exclave and the Pannonian region, respectively. Significance levels: \*  $p < 0.05$ ; \*\*  $p < 0.01$ ; \*\*\*  $p < 0.001$ .

| <i>Source of variation</i>                                                                   | <i>d.f.</i> | <i>Sum of squares</i> | <i>Variance components</i> | <i>% of total variance</i> |
|----------------------------------------------------------------------------------------------|-------------|-----------------------|----------------------------|----------------------------|
| <b>Test without regional structure (all populations analysed)</b>                            |             |                       |                            |                            |
| Among all populations                                                                        | 11          | 2521.491              | 10.90166                   | 21.76***                   |
| Within populations                                                                           | 199         | 7800.097              | 39.19647                   | 78.24                      |
| <b>Hierarchical analysis between the three geographical regions</b>                          |             |                       |                            |                            |
| Among regions                                                                                | 2           | 1125.476              | 5.70280                    | 11.04**                    |
| Among populations within regions                                                             | 9           | 1396.014              | 6.77024                    | 13.10***                   |
| Within populations                                                                           | 199         | 7800.097              | 39.19647                   | 75.86***                   |
| <b>Hierarchical analysis between the (north)westernmost exclave and the Pannonian region</b> |             |                       |                            |                            |
| Among groups                                                                                 | 1           | 840.328               | 6.54370                    | 12.29**                    |
| Among populations within groups                                                              | 10          | 1681.162              | 7.49541                    | 14.08***                   |
| Within populations                                                                           | 199         | 7800.097              | 39.19647                   | 73.63***                   |
| <b>Subset: population differentiation within the (north)westernmost exclave</b>              |             |                       |                            |                            |
| Among populations                                                                            | 3           | 736.508               | 10.49332                   | 23.54***                   |
| Within populations                                                                           | 77          | 2624.282              | 34.08159                   | 76.46                      |
| <b>Subset: population differentiation within the Pannonian region</b>                        |             |                       |                            |                            |
| Among populations                                                                            | 7           | 964.192               | 5.97509                    | 12.32***                   |
| Within populations                                                                           | 122         | 5187.585              | 42.52118                   | 87.68                      |
